# Supplementary material for: Color point tuning of Y3Al5O12 : Ce3+ phosphor via Mn2+–Si4+ incorporation for white light generation
Source: Royal Society of Chemistry journal article supplement (doi:10.1039/c2jm32233a), 2012-01-01
Supplement: c2jm32233a.pdf [file c2jm32233a.pdf]

## **Supporting information**

### **Color point tuning of $\text{Y}_3\text{Al}_5\text{O}_{12}:\text{Ce}^{3+}$ phosphor via $\text{Mn}^{2+}$ - $\text{Si}^{4+}$ incorporation for white light generation**

Yongchao Jia,<sup>a,b</sup> Yeju Huang,<sup>c</sup> Yuhua Zheng,<sup>a,b</sup> Ning Guo,<sup>a,b</sup> Hui Qiao,<sup>a,b</sup> Qi Zhao,<sup>a,b</sup> Wenzhen Lv,<sup>a,b</sup> and Hongpeng You<sup>a\*</sup>

<sup>a</sup>*State Key Laboratory of Rare Earth Resource Utilization, Changchun Institute of Applied Chemistry, Chinese Academy of Sciences, Changchun 130022, P. R. China.*

<sup>b</sup>*Graduate University of the Chinese Academy of Sciences, Beijing 100049, P. R. China.*

<sup>c</sup>*School of National Defence Science and Technology, Southwest University of Science and Technology, Mianyang 621010, P. R. China*

\*Corresponding author: E-mail address: [hpyou@ciac.jl.cn](mailto:hpyou@ciac.jl.cn)

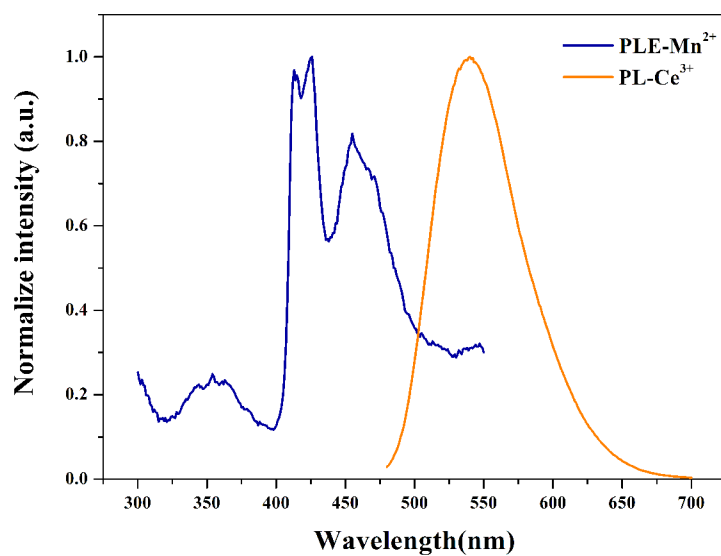

Figure S1. Spectral overlap between the normalized PL spectrum of YAG:Ce<sup>3+</sup> and the PLE spectrum of YAG:Mn<sup>2+</sup>,Si<sup>4+</sup>.
